# Supplementary material for: Long-Term Effects of Childhood Cancer Treatment on Dentition and Oral Health: A Dentist Survey Study from the DCCSS LATER 2 Study
Source: MDPI journal article supplement (doi:10.3390/cancers13215264), 2021-10-20
Supplement: s1 [file s1]

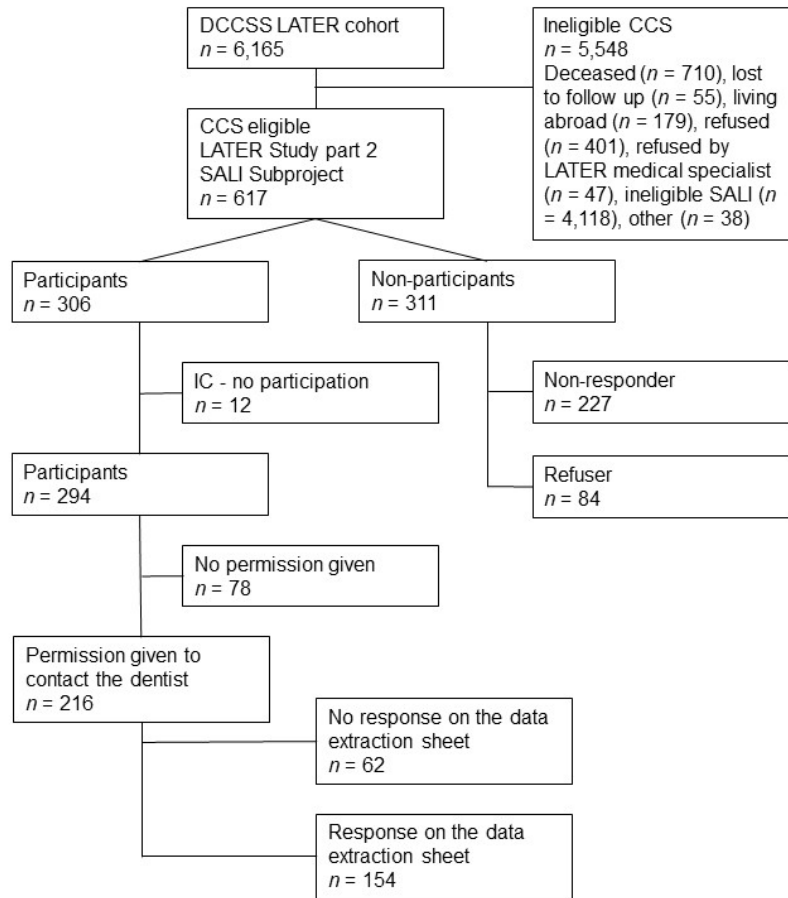

**Figure S1.** Flowchart of the inclusion process  
DCCSS LATER; Dutch Childhood Cancer Survivor Late Effect Study, IC – no participation; survivors signed informed consent for participation however data collection was hampered for different reasons

**Table S1.** Dose values per field of H&N RT

|                         | Total cumulative irradiation dose (Gy) |                      |
|-------------------------|----------------------------------------|----------------------|
|                         | Mean (sd)                              | Median (range)       |
| H&N RT ( <i>n</i> = 47) | 26.41 (19.24)                          | 25.00 (7.50–100.80)  |
| Head/cranium            |                                        |                      |
| Brain ( <i>n</i> = 21)  | 33.03 (13.27)                          | 25.00 (18.00–60.00)  |
| Face ( <i>n</i> = 5)    | 51.08 (32.18)                          | 39.60 (25.00–100.80) |
| Neck ( <i>n</i> = 5)    | 29.84 (9.90)                           | 30.00 (19.80–40.00)  |
| TBI ( <i>n</i> = 16)    | 8.94 (2.14)                            | 7.50 (7.50–12.00)    |

Gy; gray, H&N RT; head/neck radiotherapy, TBI; total body irradiation

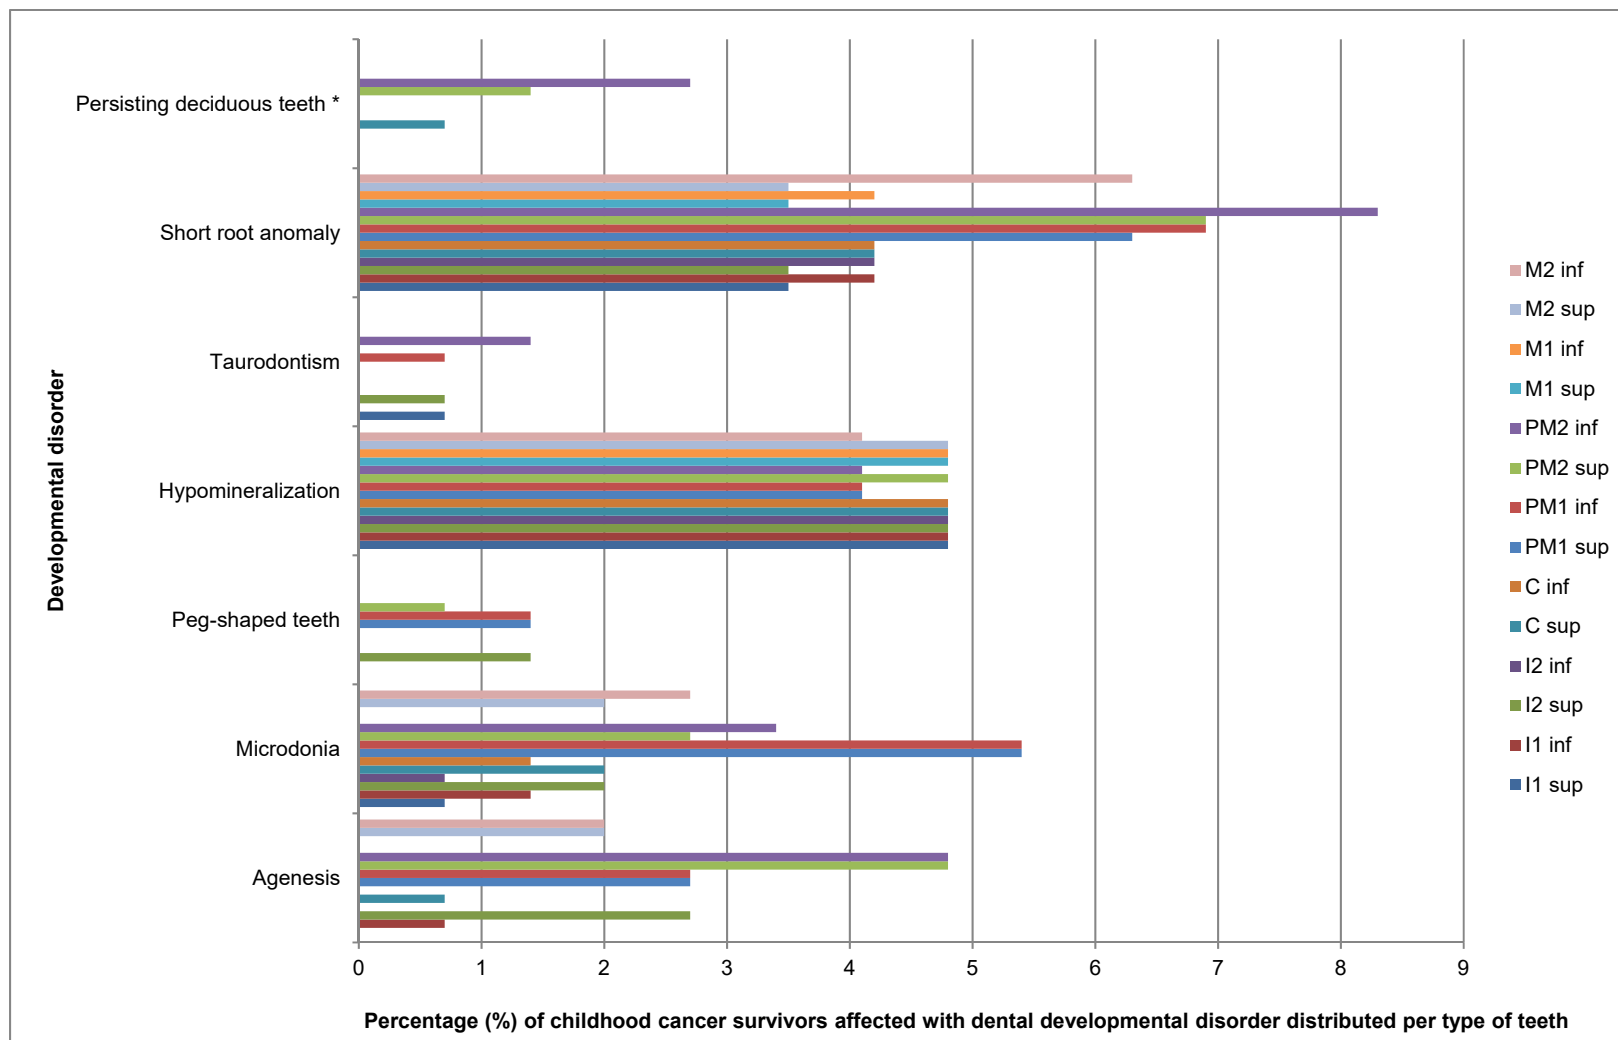

**Figure S2.** Distribution of teeth affected by different dental developmental disorders in childhood cancer survivors.

Sup; superior, inf; inferior, I1; central incisor, I2; lateral incisor, C; cuspid, PM1; first premolar, PM2; second premolar, M1; first molar, M2; second molar. Missing values were excluded from descriptive analysis. \*relevant elements should be read as primary teeth.
